# Supplementary material for: Quality grade evaluation and related antioxidant activity research of different medicinal parts of Catalpa fruit
Source: Royal Society of Chemistry journal article supplement (doi:10.1039/d2ay00919f), 2022-01-01
Supplement: d2ay00919f1.pdf [file d2ay00919f1.pdf]

## Quality grade evaluation and related antioxidant activity research of different medicinal parts of Catalpa fruit

Wanzhen Xiao, Dandan Gong, Xiang Li, Ping Guo\*, Guoxiang Sun\*

(School of Pharmacy, Shenyang Pharmaceutical University, Shenyang, Liaoning, 110016, China)

\* Corresponding author.

E-mail address: [guoping20023@163.com](mailto:guoping20023@163.com) (P. Guo),

[gxswmwys@163.com](mailto:gxswmwys@163.com) (G. Sun).

**Table S1** Grading criteria of TCM by SQFM.

| Para.         | I      | II     | III    | IV     | V      | VI     | VII    | VIII            |
|---------------|--------|--------|--------|--------|--------|--------|--------|-----------------|
| $S_m \geq$    | 0.95   | 0.90   | 0.85   | 0.80   | 0.70   | 0.60   | 0.50   | $S_m < 0.5$     |
| $P_m / \% =$  | 95-105 | 90-110 | 85-115 | 80-120 | 70-130 | 60-140 | 50-150 | $0 \sim \infty$ |
| $\alpha \leq$ | 0.05   | 0.10   | 0.15   | 0.20   | 0.30   | 0.40   | 0.50   | $> 0.50$        |
| Grade         | 1      | 2      | 3      | 4      | 5      | 6      | 7      | 8               |

**Table S2** The  $P_i$ ,  $P_{2c}$  values and correlation coefficient ( $r$ ) of pericarp and seed samples.

| No. | Pericarp     |              |          |       | Seed         |              |          |       |
|-----|--------------|--------------|----------|-------|--------------|--------------|----------|-------|
|     | PHA<br>$P_i$ | CPE<br>$P_i$ | $P_{2c}$ | $P_m$ | PHA<br>$P_i$ | CPE<br>$P_i$ | $P_{2c}$ | $P_m$ |
| S1  | 130.1        | 74.6         | 102.3    | 119.1 | 134.7        | 206.3        | 170.5    | 104.5 |
| S2  | 70.0         | 36.9         | 53.5     | 73.9  | 135.5        | 79.1         | 107.3    | 112.8 |
| S3  | 102.6        | 90.7         | 96.7     | 124.9 | 144.8        | 119.7        | 132.3    | 131.7 |
| S4  | 155.8        | 469.0        | 312.4    | 155.7 | 99.3         | 133.7        | 116.5    | 111.4 |
| S5  | 120.3        | 56.1         | 88.2     | 102.7 | 80.1         | 79.7         | 79.9     | 93.2  |
| S6  | 51.4         | 40.2         | 45.8     | 58.6  | 89.7         | 76.9         | 83.3     | 92.5  |
| S7  | 114.5        | 56.6         | 85.6     | 88.1  | 121.5        | 178.7        | 150.1    | 116.3 |
| S8  | 112.6        | 377.8        | 245.2    | 137.4 | 102.1        | 161.2        | 131.6    | 125.0 |
| S9  | 112.8        | 50.0         | 81.4     | 106.3 | 113.0        | 136.6        | 124.8    | 106.1 |
| S10 | 95.9         | 40.5         | 68.2     | 118.6 | 87.0         | 78.8         | 82.9     | 98.1  |
| S11 | 67.6         | 29.2         | 48.4     | 73.4  | 92.3         | 102.0        | 97.2     | 99.4  |
| S12 | 101.8        | 36.7         | 69.2     | 84.4  | 35.0         | 13.1         | 24.0     | 53.3  |
| S13 | 136.5        | 118.9        | 127.7    | 136.0 | 95.4         | 94.3         | 94.9     | 111.5 |
| S14 | 42.6         | 7.0          | 24.8     | 46.6  | 46.5         | 10.4         | 28.4     | 51.4  |
| S15 | 85.9         | 13.8         | 49.8     | 67.0  | 123.8        | 29.2         | 76.5     | 82.7  |
| $r$ |              | 0.8124       |          |       |              | 0.8544       |          |       |

**Table S3** The results of antioxidant activity assayed by DPPH method of 15 batches of Catalpa fruit pericarp or seed.

| No. | Pericarp             |          | Seed                 |          |
|-----|----------------------|----------|----------------------|----------|
|     | Regression equation  | <i>r</i> | Regression equation  | <i>r</i> |
| S1  | $y = 29.43x + 13.84$ | 0.9982   | $y = 45.90x + 7.287$ | 0.9972   |
| S2  | $y = 26.63x + 2.295$ | 0.9974   | $y = 39.91x + 2.634$ | 0.9970   |
| S3  | $y = 33.37x + 4.619$ | 0.9945   | $y = 39.87x + 4.251$ | 0.9976   |
| S4  | $y = 36.82x + 13.59$ | 0.9967   | $y = 42.11x + 5.454$ | 0.9959   |
| S5  | $y = 24.26x + 0.877$ | 0.9965   | $y = 38.57x + 3.783$ | 0.9988   |
| S6  | $y = 26.44x + 7.733$ | 0.9954   | $y = 36.97x + 4.042$ | 0.9971   |
| S7  | $y = 28.23x + 5.605$ | 0.9972   | $y = 43.39x + 5.916$ | 0.9969   |
| S8  | $y = 65.35x + 7.199$ | 0.9964   | $y = 44.98x + 6.000$ | 0.9975   |
| S9  | $y = 27.64x + 8.201$ | 0.9945   | $y = 36.95x + 5.287$ | 0.9968   |
| S10 | $y = 27.58x + 7.534$ | 0.9978   | $y = 39.38x + 3.457$ | 0.9977   |
| S11 | $y = 29.33x + 5.822$ | 0.9942   | $y = 40.89x + 4.400$ | 0.9939   |
| S12 | $y = 22.47x + 4.945$ | 0.9981   | $y = 23.49x + 0.186$ | 0.9969   |
| S13 | $y = 33.00x + 9.315$ | 0.9926   | $y = 42.20x + 2.400$ | 0.9904   |
| S14 | $y = 19.17x + 4.734$ | 0.9957   | $y = 23.69x + 2.128$ | 0.9940   |
| S15 | $y = 21.98x + 2.633$ | 0.9979   | $y = 26.30x + 3.397$ | 0.9982   |

**Table S4** The results of bivariate correlation analysis (BCA) method of pericarp and seed samples.

| Peak No. | Pericarp        |                 | Peak No. | Seed            |                 |
|----------|-----------------|-----------------|----------|-----------------|-----------------|
|          | $r_p$           | <i>P</i> -value |          | $r_p$           | <i>P</i> -value |
| 1        | <b>-0.513*</b>  | 0.05            | 1        | <b>-0.523*</b>  | 0.046           |
| 2        | -0.477          | 0.072           | 2        | <b>-0.539*</b>  | 0.039           |
| 3        | <b>0.651**</b>  | 0.009           | 3        | <b>-0.655**</b> | 0.008           |
| 4        | <b>-0.598*</b>  | 0.019           | 4        | -0.448          | 0.094           |
| 5        | -0.507          | 0.053           | 5        | -0.234          | 0.401           |
| 6        | -0.335          | 0.222           | 6        | <b>-0.822**</b> | 0.000           |
| 7        | <b>-0.580*</b>  | 0.023           | 7        | <b>-0.855**</b> | 0.000           |
| 8        | -0.477          | 0.071           | 8        | <b>-0.618*</b>  | 0.014           |
| 9        | <b>-0.552*</b>  | 0.033           | 9        | <b>-0.817**</b> | 0.000           |
| 10       | <b>-0.749**</b> | 0.001           | 10       | -0.269          | 0.335           |
| 11       | -0.160          | 0.565           | 11       | <b>-0.729**</b> | 0.002           |
| 12       | -0.056          | 0.838           | 12       | <b>-0.778**</b> | 0.001           |
| 13       | -0.275          | 0.318           |          |                 |                 |
| 14       | -0.320          | 0.243           |          |                 |                 |

\* , \*\* represents significant correlation at the 0.05 and 0.01 level (two-tailed), respectively.
